# Supplementary material
Source: HighWire-hosted journal article supplement (https://ebn.bmj.com/content/suppl/2007/01/31/9.1)
Supplement: 13Oct06.pdf [file 13Oct06.pdf]

## OTHER ARTICLES NOTED (13 October 2006)

A list of the journals that are reviewed and the criteria for selecting articles from these journals for inclusion in *Evidence-Based Nursing* are included in each issue. The following articles passed all criteria but were not abstracted because, in the judgment of the editors, their findings were less widely applicable to nursing practice, the topic was of interest to only a select group of nurse specialists, or the topic was recently addressed in another abstract.

### Treatment

Antoni MH, Wimberly SR, Lechner SC, *et al.* Reduction of cancer-specific thought intrusions and anxiety symptoms with a stress management intervention among women undergoing treatment for breast cancer. *Am J Psychiatry* 2006; **163**:1791–7. [http://www.ncbi.nlm.nih.gov/entrez/query.fcgi?cmd=Retrieve&db=pubmed&dopt=Abstract&list\\_uids=17012691](http://www.ncbi.nlm.nih.gov/entrez/query.fcgi?cmd=Retrieve&db=pubmed&dopt=Abstract&list_uids=17012691)

Atik B, Thanh TT, Luong VQ, *et al.* Impact of annual targeted treatment on infectious trachoma and susceptibility to reinfection. *JAMA* 2006; **296**:1488–97. [http://www.ncbi.nlm.nih.gov/entrez/query.fcgi?cmd=Retrieve&db=pubmed&dopt=Abstract&list\\_uids=17003397](http://www.ncbi.nlm.nih.gov/entrez/query.fcgi?cmd=Retrieve&db=pubmed&dopt=Abstract&list_uids=17003397)

Berger W, Hampel F Jr, Bernstein J, *et al.* Impact of azelastine nasal spray on symptoms and quality of life compared with cetirizine oral tablets in patients with seasonal allergic rhinitis. *Ann Allergy Asthma Immunol* 2006; **97**:375–81. No PMID available.

Black MM, Bentley ME, Papas MA, *et al.* Delaying second births among adolescent mothers: a randomized, controlled trial of a home-based mentoring program. *Pediatrics* 2006; **118**:e1087–99. [http://www.ncbi.nlm.nih.gov/entrez/query.fcgi?cmd=Retrieve&db=pubmed&dopt=Abstract&list\\_uids=17015500](http://www.ncbi.nlm.nih.gov/entrez/query.fcgi?cmd=Retrieve&db=pubmed&dopt=Abstract&list_uids=17015500)

Boehncke WH, Prinz J, Gottlieb AB. Biologic therapies for psoriasis. A systematic review. *J Rheumatol* 2006; **33**:1447–51. [http://www.ncbi.nlm.nih.gov/entrez/query.fcgi?cmd=Retrieve&db=pubmed&dopt=Abstract&list\\_uids=16724367](http://www.ncbi.nlm.nih.gov/entrez/query.fcgi?cmd=Retrieve&db=pubmed&dopt=Abstract&list_uids=16724367)

Buchbinder R, Green SE, Youd JM, *et al.* Systematic review of the efficacy and safety of shock wave therapy for lateral elbow pain. *J Rheumatol* 2006; **33**:1351–63. [http://www.ncbi.nlm.nih.gov/entrez/query.fcgi?cmd=Retrieve&db=pubmed&dopt=Abstract&list\\_uids=16821270](http://www.ncbi.nlm.nih.gov/entrez/query.fcgi?cmd=Retrieve&db=pubmed&dopt=Abstract&list_uids=16821270)

Casele H, Haney EI, James A, *et al.* Bone density changes in women who receive thromboprophylaxis in pregnancy. *Am J Obstet Gynecol* 2006; **195**:1109–13. [http://www.ncbi.nlm.nih.gov/entrez/query.fcgi?cmd=Retrieve&db=pubmed&dopt=Abstract&list\\_uids=17000242](http://www.ncbi.nlm.nih.gov/entrez/query.fcgi?cmd=Retrieve&db=pubmed&dopt=Abstract&list_uids=17000242)

Diabetes Research in Children Network (DirecNet) Study Group. Prevention of hypoglycemia during exercise in children with type 1 diabetes by suspending basal insulin. *Diabetes Care* 2006; **29**:2200–4.

[http://www.ncbi.nlm.nih.gov/entrez/query.fcgi?cmd=Retrieve&db=pubmed&dopt=Abstract&list\\_uids=17003293](http://www.ncbi.nlm.nih.gov/entrez/query.fcgi?cmd=Retrieve&db=pubmed&dopt=Abstract&list_uids=17003293)

Dobscha SK, Corson K, Hickam DH, *et al.* Depression decision support in primary care: a cluster randomized trial. *Ann Intern Med* 2006; **145**: 477–87.

[http://www.ncbi.nlm.nih.gov/entrez/query.fcgi?cmd=Retrieve&db=pubmed&dopt=Abstract&list\\_uids=17015865](http://www.ncbi.nlm.nih.gov/entrez/query.fcgi?cmd=Retrieve&db=pubmed&dopt=Abstract&list_uids=17015865)

DREAM Trial Investigators. Effect of ramipril on the incidence of diabetes. *N Engl J Med* 2006; **355**: 1551–62.

[http://www.ncbi.nlm.nih.gov/entrez/query.fcgi?cmd=Retrieve&db=pubmed&dopt=Abstract&list\\_uids=16980380](http://www.ncbi.nlm.nih.gov/entrez/query.fcgi?cmd=Retrieve&db=pubmed&dopt=Abstract&list_uids=16980380)

Edelman S, Garg S, Frias J, *et al.* A double-blind, placebo-controlled trial assessing pramlintide treatment in the setting of intensive insulin therapy in type 1 diabetes. *Diabetes Care* 2006; **29**: 2189–95.

[http://www.ncbi.nlm.nih.gov/entrez/query.fcgi?cmd=Retrieve&db=pubmed&dopt=Abstract&list\\_uids=17003291](http://www.ncbi.nlm.nih.gov/entrez/query.fcgi?cmd=Retrieve&db=pubmed&dopt=Abstract&list_uids=17003291)

Harvey S, Stevens K, Harrison D, *et al.* An evaluation of the clinical and cost-effectiveness of pulmonary artery catheters in patient management in intensive care: a systematic review and a randomised controlled trial. *Health Technol Assess* 2006; **10**: 1–150.

[http://www.ncbi.nlm.nih.gov/entrez/query.fcgi?cmd=Retrieve&db=pubmed&dopt=Abstract&list\\_uids=16904048](http://www.ncbi.nlm.nih.gov/entrez/query.fcgi?cmd=Retrieve&db=pubmed&dopt=Abstract&list_uids=16904048)

Hedström M, Ljungqvist O, Cederholm T. Metabolism and catabolism in hip fracture patients: nutritional and anabolic intervention—a review. *Acta Orthop* 2006; **77**: 741–7.

No PMID available.

Hoglund P, Amlö S, Marble A, *et al.* Analysis of the patient-therapist relationship in dynamic psychotherapy: an experimental study of transference interpretations. *Am J Psychiatry* 2006; **163**: 1739–46.

[http://www.ncbi.nlm.nih.gov/entrez/query.fcgi?cmd=Retrieve&db=pubmed&dopt=Abstract&list\\_uids=17012684](http://www.ncbi.nlm.nih.gov/entrez/query.fcgi?cmd=Retrieve&db=pubmed&dopt=Abstract&list_uids=17012684)

Hollingsworth JM, Rogers MA, Kaufman SR, *et al.* Medical therapy to facilitate urinary stone passage: a meta-analysis. *Lancet* 2006; **368**: 1171–9.

[http://www.ncbi.nlm.nih.gov/entrez/query.fcgi?cmd=Retrieve&db=pubmed&dopt=Abstract&list\\_uids=17011944](http://www.ncbi.nlm.nih.gov/entrez/query.fcgi?cmd=Retrieve&db=pubmed&dopt=Abstract&list_uids=17011944)

Hultén E, Jackson JL, Douglas K, *et al.* The effect of early, intensive statin therapy on acute coronary syndrome: a meta-analysis of randomized controlled trials. *Arch Intern Med* 2006; **166**: 1814–21.

[http://www.ncbi.nlm.nih.gov/entrez/query.fcgi?cmd=Retrieve&db=pubmed&dopt=Abstract&list\\_uids=17000936](http://www.ncbi.nlm.nih.gov/entrez/query.fcgi?cmd=Retrieve&db=pubmed&dopt=Abstract&list_uids=17000936)

Jat GC, Mathew JL, Singh M. Treatment with 400 µg of inhaled budesonide vs 200 µg of inhaled budesonide and oral montelukast in children with moderate persistent asthma: randomized controlled trial. *Ann Allergy Asthma Immunol* 2006; **97**: 397–401.

No PMID available.

Jones PB, Barnes TR, Davies L, *et al.* Randomized controlled trial of the effect on quality of life of second- vs first-generation antipsychotic drugs in schizophrenia: Cost Utility of the Latest Antipsychotic Drugs in Schizophrenia Study (CUtLASS 1). *Arch Gen Psychiatry* 2006; **63**: 1079–87.

[http://www.ncbi.nlm.nih.gov/entrez/query.fcgi?cmd=Retrieve&db=pubmed&dopt=Abstract&list\\_uids=17015810](http://www.ncbi.nlm.nih.gov/entrez/query.fcgi?cmd=Retrieve&db=pubmed&dopt=Abstract&list_uids=17015810)

Melvin GA, Tonge BJ, King NJ, *et al.* A comparison of cognitive-behavioral therapy, sertraline, and their combination for adolescent depression. *J Am Acad Child Adolesc Psychiatry* 2006; **45**: 1151–61.

[http://www.ncbi.nlm.nih.gov/entrez/query.fcgi?cmd=Retrieve&db=pubmed&dopt=Abstract&list\\_uids=17003660](http://www.ncbi.nlm.nih.gov/entrez/query.fcgi?cmd=Retrieve&db=pubmed&dopt=Abstract&list_uids=17003660)

Nakamura H, Arakawa K, Itakura H, *et al.* Primary prevention of cardiovascular disease with pravastatin in Japan (MEGA Study): a prospective randomised controlled trial. *Lancet* 2006; **368**: 1155–63.

[http://www.ncbi.nlm.nih.gov/entrez/query.fcgi?cmd=Retrieve&db=pubmed&dopt=Abstract&list\\_uids=17011942](http://www.ncbi.nlm.nih.gov/entrez/query.fcgi?cmd=Retrieve&db=pubmed&dopt=Abstract&list_uids=17011942)

Nathan RA, Finn FA, LaForce C, *et al.* Comparison of cetirizine-pseudoephedrine and placebo in patients with seasonal allergic rhinitis and concomitant mild-to-moderate asthma: randomized, double-blind study. *Ann Allergy Asthma Immunol* 2006; **97**: 389–96.

No PMID available.

Pearlman D, Milgrom H, Till D, *et al.* Effect of formoterol fumarate treatment on exercise-induced bronchoconstriction in children. *Ann Allergy Asthma Immunol* 2006; **97**: 382–8.

No PMID available.

Reyes ZC, Claire N, Tauscher MK, *et al.* Randomized, controlled trial comparing synchronized intermittent mandatory ventilation and synchronized intermittent mandatory ventilation plus pressure support in preterm infants. *Pediatrics* 2006; **118**: 1409–17.

[http://www.ncbi.nlm.nih.gov/entrez/query.fcgi?cmd=Retrieve&db=pubmed&dopt=Abstract&list\\_uids=17015530](http://www.ncbi.nlm.nih.gov/entrez/query.fcgi?cmd=Retrieve&db=pubmed&dopt=Abstract&list_uids=17015530)

Roberts KD, Leone TA, Edwards WH, *et al.* Premedication for nonemergent neonatal intubations: a randomized, controlled trial comparing atropine and fentanyl to atropine, fentanyl, and mivacurium. *Pediatrics* 2006; **118**: 1583–91.

[http://www.ncbi.nlm.nih.gov/entrez/query.fcgi?cmd=Retrieve&db=pubmed&dopt=Abstract&list\\_uids=17015550](http://www.ncbi.nlm.nih.gov/entrez/query.fcgi?cmd=Retrieve&db=pubmed&dopt=Abstract&list_uids=17015550)

Rosenberg VA, Eglinton GS, Rauch ER, *et al.* Intrapartum maternal glycemic control in women with insulin requiring diabetes: a randomized clinical trial of rotating fluids versus insulin drip. *Am J Obstet Gynecol* 2006; **195**: 1095–9.

[http://www.ncbi.nlm.nih.gov/entrez/query.fcgi?cmd=Retrieve&db=pubmed&dopt=Abstract&list\\_uids=16893507](http://www.ncbi.nlm.nih.gov/entrez/query.fcgi?cmd=Retrieve&db=pubmed&dopt=Abstract&list_uids=16893507)

Ruhe HG, Huyser J, Swinkels JA, *et al.* Dose escalation for insufficient response to standard-dose selective serotonin reuptake inhibitors in major depressive disorder: systematic review. *Br J Psychiatry* 2006; **189**: 309–16.

[http://www.ncbi.nlm.nih.gov/entrez/query.fcgi?cmd=Retrieve&db=pubmed&dopt=Abstract&list\\_uids=17012653](http://www.ncbi.nlm.nih.gov/entrez/query.fcgi?cmd=Retrieve&db=pubmed&dopt=Abstract&list_uids=17012653)

Slade M, McCrone P, Kuipers E, *et al.* Use of standardised outcome measures in adult mental health services: randomised controlled trial. *Br J Psychiatry* 2006; **189**:330–6.

[http://www.ncbi.nlm.nih.gov/entrez/query.fcgi?cmd=Retrieve&db=pubmed&dopt=Abstract&list\\_uids=17012656](http://www.ncbi.nlm.nih.gov/entrez/query.fcgi?cmd=Retrieve&db=pubmed&dopt=Abstract&list_uids=17012656)

Smith GA, Splaingard M, Hayes JR, *et al.* Comparison of a personalized parent voice smoke alarm with a conventional residential tone smoke alarm for awakening children. *Pediatrics* 2006; **118**:1623–32.

[http://www.ncbi.nlm.nih.gov/entrez/query.fcgi?cmd=Retrieve&db=pubmed&dopt=Abstract&list\\_uids=17015555](http://www.ncbi.nlm.nih.gov/entrez/query.fcgi?cmd=Retrieve&db=pubmed&dopt=Abstract&list_uids=17015555)

Soriano ER, McHugh NJ. Therapies for peripheral joint disease in psoriatic arthritis. A systematic review. *J Rheumatol* 2006; **33**:1422–30.

[http://www.ncbi.nlm.nih.gov/entrez/query.fcgi?cmd=Retrieve&db=pubmed&dopt=Abstract&list\\_uids=16724372](http://www.ncbi.nlm.nih.gov/entrez/query.fcgi?cmd=Retrieve&db=pubmed&dopt=Abstract&list_uids=16724372)

Strober BE, Siu K, Menon K. Conventional systemic agents for psoriasis. A systematic review. *J Rheumatol* 2006; **33**:1442–6.

[http://www.ncbi.nlm.nih.gov/entrez/query.fcgi?cmd=Retrieve&db=pubmed&dopt=Abstract&list\\_uids=16724368](http://www.ncbi.nlm.nih.gov/entrez/query.fcgi?cmd=Retrieve&db=pubmed&dopt=Abstract&list_uids=16724368)

Yardley L, Kirby S. Evaluation of booklet-based self-management of symptoms in Meniere disease: a randomized controlled trial. *Psychosom Med* 2006; **68**:762–9.

[http://www.ncbi.nlm.nih.gov/entrez/query.fcgi?cmd=Retrieve&db=pubmed&dopt=Abstract&list\\_uids=17012531](http://www.ncbi.nlm.nih.gov/entrez/query.fcgi?cmd=Retrieve&db=pubmed&dopt=Abstract&list_uids=17012531)

Zhang J, Ding EL, Song Y. Adverse effects of cyclooxygenase 2 inhibitors on renal and arrhythmia events: meta-analysis of randomized trials. *JAMA* 2006; **296**:1619–32.

[http://www.ncbi.nlm.nih.gov/entrez/query.fcgi?cmd=Retrieve&db=pubmed&dopt=Abstract&list\\_uids=16968832](http://www.ncbi.nlm.nih.gov/entrez/query.fcgi?cmd=Retrieve&db=pubmed&dopt=Abstract&list_uids=16968832)

## **Assessment (screening or diagnosis)**

Geifman-Holtzman O, Grotegut CA, Gaughan JP. Diagnostic accuracy of noninvasive fetal Rh genotyping from maternal blood—a meta-analysis. *Am J Obstet Gynecol* 2006; **195**:1163–73.

[http://www.ncbi.nlm.nih.gov/entrez/query.fcgi?cmd=Retrieve&db=pubmed&dopt=Abstract&list\\_uids=17000250](http://www.ncbi.nlm.nih.gov/entrez/query.fcgi?cmd=Retrieve&db=pubmed&dopt=Abstract&list_uids=17000250)

## **Prognosis**

Dickens CM, McGowan L, Percival C, *et al.* Contribution of depression and anxiety to impaired health-related quality of life following first myocardial infarction. *Br J Psychiatry* 2006; **189**:367–72.

[http://www.ncbi.nlm.nih.gov/entrez/query.fcgi?cmd=Retrieve&db=pubmed&dopt=Abstract&list\\_uids=17012661](http://www.ncbi.nlm.nih.gov/entrez/query.fcgi?cmd=Retrieve&db=pubmed&dopt=Abstract&list_uids=17012661)

Kirkegaard I, Obel C, Hedegaard M, *et al.* Gestational age and birth weight in relation to school performance of 10-year-old children: a follow-up study of children born after 32 completed weeks. *Pediatrics* 2006; **118**: 1600–6.

[http://www.ncbi.nlm.nih.gov/entrez/query.fcgi?cmd=Retrieve&db=pubmed&dopt=Abstract&list\\_uids=17015552](http://www.ncbi.nlm.nih.gov/entrez/query.fcgi?cmd=Retrieve&db=pubmed&dopt=Abstract&list_uids=17015552)

Kusuda S, Fujimura M, Sakuma I, *et al.* Morbidity and mortality of infants with very low birth weight in Japan: center variation. *Pediatrics* 2006; **118**: e1130–8.

[http://www.ncbi.nlm.nih.gov/entrez/query.fcgi?cmd=Retrieve&db=pubmed&dopt=Abstract&list\\_uids=16950943](http://www.ncbi.nlm.nih.gov/entrez/query.fcgi?cmd=Retrieve&db=pubmed&dopt=Abstract&list_uids=16950943)

Schofield CJ, Libby G, Brennan GM, *et al.* Mortality and hospitalization in patients after amputation: a comparison between patients with and without diabetes. *Diabetes Care* 2006; **29**: 2252–6.

[http://www.ncbi.nlm.nih.gov/entrez/query.fcgi?cmd=Retrieve&db=pubmed&dopt=Abstract&list\\_uids=17003302](http://www.ncbi.nlm.nih.gov/entrez/query.fcgi?cmd=Retrieve&db=pubmed&dopt=Abstract&list_uids=17003302)

## Causation

Chandola T, Deary IJ, Blane D, *et al.* Childhood IQ in relation to obesity and weight gain in adult life: the National Child Development (1958) Study. *Int J Obes (Lond)* 2006; **30**: 1422–32.

[http://www.ncbi.nlm.nih.gov/entrez/query.fcgi?cmd=Retrieve&db=pubmed&dopt=Abstract&list\\_uids=16520812](http://www.ncbi.nlm.nih.gov/entrez/query.fcgi?cmd=Retrieve&db=pubmed&dopt=Abstract&list_uids=16520812)

McGettigan P, Henry D. Cardiovascular risk and inhibition of cyclooxygenase: a systematic review of the observational studies of selective and nonselective inhibitors of cyclooxygenase 2. *JAMA* 2006; **296**: 1633–44.

[http://www.ncbi.nlm.nih.gov/entrez/query.fcgi?cmd=Retrieve&db=pubmed&dopt=Abstract&list\\_uids=16968831](http://www.ncbi.nlm.nih.gov/entrez/query.fcgi?cmd=Retrieve&db=pubmed&dopt=Abstract&list_uids=16968831)

Shah T, Sullivan K, Carter J. Sudden infant death syndrome and reported maternal smoking during pregnancy. *Am J Public Health* 2006; **96**: 1757–9.

[http://www.ncbi.nlm.nih.gov/entrez/query.fcgi?cmd=Retrieve&db=pubmed&dopt=Abstract&list\\_uids=17008569](http://www.ncbi.nlm.nih.gov/entrez/query.fcgi?cmd=Retrieve&db=pubmed&dopt=Abstract&list_uids=17008569)

Villamor E, Cnattingius S. Interpregnancy weight change and risk of adverse pregnancy outcomes: a population-based study. *Lancet* 2006; **368**: 1164–70.

[http://www.ncbi.nlm.nih.gov/entrez/query.fcgi?cmd=Retrieve&db=pubmed&dopt=Abstract&list\\_uids=17011943](http://www.ncbi.nlm.nih.gov/entrez/query.fcgi?cmd=Retrieve&db=pubmed&dopt=Abstract&list_uids=17011943)

Zhu JL, Basso O, Obel C, *et al.* Infertility, infertility treatment, and congenital malformations: Danish national birth cohort. *BMJ* 2006; **333**: 679.

[http://www.ncbi.nlm.nih.gov/entrez/query.fcgi?cmd=Retrieve&db=pubmed&dopt=Abstract&list\\_uids=16893903](http://www.ncbi.nlm.nih.gov/entrez/query.fcgi?cmd=Retrieve&db=pubmed&dopt=Abstract&list_uids=16893903)

## Quality improvement

Coleman EA, Parry C, Chalmers S, *et al.* The care transitions intervention: results of a randomized controlled trial. *Arch Intern Med* 2006; **166**: 1822–8.

[http://www.ncbi.nlm.nih.gov/entrez/query.fcgi?cmd=Retrieve&db=pubmed&dopt=Abstract&list\\_uids=17000937](http://www.ncbi.nlm.nih.gov/entrez/query.fcgi?cmd=Retrieve&db=pubmed&dopt=Abstract&list_uids=17000937)

## Economics

Flood C, Byford S, Henderson C, *et al.* Joint crisis plans for people with psychosis: economic evaluation of a randomised controlled trial. *BMJ* 2006; **333**: 729.

[http://www.ncbi.nlm.nih.gov/entrez/query.fcgi?cmd=Retrieve&db=pubmed&dopt=Abstract&list\\_uids=16914458](http://www.ncbi.nlm.nih.gov/entrez/query.fcgi?cmd=Retrieve&db=pubmed&dopt=Abstract&list_uids=16914458)

Gilbody S, Bower P, Whitty P. Costs and consequences of enhanced primary care for depression: systematic review of randomised economic evaluations. *Br J Psychiatry* 2006; **189**: 297–308.

[http://www.ncbi.nlm.nih.gov/entrez/query.fcgi?cmd=Retrieve&db=pubmed&dopt=Abstract&list\\_uids=17012652](http://www.ncbi.nlm.nih.gov/entrez/query.fcgi?cmd=Retrieve&db=pubmed&dopt=Abstract&list_uids=17012652)

## Clinical prediction guides

Klastersky J, Paesmans M, Georgala A, *et al.* Outpatient oral antibiotics for febrile neutropenic cancer patients using a score predictive for complications. *J Clin Oncol* 2006; **24**: 4129–34.

[http://www.ncbi.nlm.nih.gov/entrez/query.fcgi?cmd=Retrieve&db=pubmed&dopt=Abstract&list\\_uids=16943529](http://www.ncbi.nlm.nih.gov/entrez/query.fcgi?cmd=Retrieve&db=pubmed&dopt=Abstract&list_uids=16943529)

## Qualitative

Devine CM, Jastran M, Jabs J, *et al.* "A lot of sacrifices:" work-family spillover and the food choice coping strategies of low-wage employed parents. *Soc Sci Med* 2006; **63**: 2591–603.

[http://www.ncbi.nlm.nih.gov/entrez/query.fcgi?cmd=Retrieve&db=pubmed&dopt=Abstract&list\\_uids=16889881](http://www.ncbi.nlm.nih.gov/entrez/query.fcgi?cmd=Retrieve&db=pubmed&dopt=Abstract&list_uids=16889881)

Donnelly F, Wiechula R. The lived experience of a tracheostomy tube change: a phenomenological study. *J Clin Nurs* 2006; **15**: 1115–22.

[http://www.ncbi.nlm.nih.gov/entrez/query.fcgi?cmd=Retrieve&db=pubmed&dopt=Abstract&list\\_uids=16911052](http://www.ncbi.nlm.nih.gov/entrez/query.fcgi?cmd=Retrieve&db=pubmed&dopt=Abstract&list_uids=16911052)

Eriksson C, Jansson L, Hamberg K. Women's experiences of intense fear related to childbirth investigated in a Swedish qualitative study. *Midwifery* 2006; **22**: 240–8.

[http://www.ncbi.nlm.nih.gov/entrez/query.fcgi?cmd=Retrieve&db=pubmed&dopt=Abstract&list\\_uids=16603282](http://www.ncbi.nlm.nih.gov/entrez/query.fcgi?cmd=Retrieve&db=pubmed&dopt=Abstract&list_uids=16603282)

Fairley D, Closs SJ. Evaluation of a nurse consultant's clinical activities and the search for patient outcomes in critical care. *J Clin Nurs* 2006; **15**: 1106–14.

[http://www.ncbi.nlm.nih.gov/entrez/query.fcgi?cmd=Retrieve&db=pubmed&dopt=Abstract&list\\_uids=16911051](http://www.ncbi.nlm.nih.gov/entrez/query.fcgi?cmd=Retrieve&db=pubmed&dopt=Abstract&list_uids=16911051)

McKenzie PJ. The seeking of baby-feeding information by Canadian women pregnant with twins. *Midwifery* 2006; **22**: 218–27.

[http://www.ncbi.nlm.nih.gov/entrez/query.fcgi?cmd=Retrieve&db=pubmed&dopt=Abstract&list\\_uids=16697092](http://www.ncbi.nlm.nih.gov/entrez/query.fcgi?cmd=Retrieve&db=pubmed&dopt=Abstract&list_uids=16697092)

Rodriguez MA, Wallace SP, Woolf NH, *et al.* Mandatory reporting of elder abuse: between a rock and a hard place. *Ann Fam Med* 2006; **4**: 403–9.

[http://www.ncbi.nlm.nih.gov/entrez/query.fcgi?cmd=Retrieve&db=pubmed&dopt=Abstract&list\\_uids=17003139](http://www.ncbi.nlm.nih.gov/entrez/query.fcgi?cmd=Retrieve&db=pubmed&dopt=Abstract&list_uids=17003139)
